# Supplementary material for: Altered Trabecular Bone Structure and Delayed Cartilage Degeneration in the Knees of Collagen VI Null Mice
Source: PLoS One. 2012 Mar 20;7(3):e33397. doi: 10.1371/journal.pone.0033397 (PMC3308976; doi:10.1371/journal.pone.0033397)
Supplement: Table S1 — MicroCT measurments of bone properties. Bone properties were determined using microCT imaging and analysis as shown in Figure 3. Significant differences in bone properties were noted by genotype and age. Data are presented as mean ± standard deviation (n = 8 samples per group except n = 9 for wild-type 15 mo). *p<0.05, **p<0.01. The F-statistic is reported for p<0.5 in order of Age, Genotype, and Age-by-Genotype. (XLSX) [file pone.0033397.s001.xlsx]

## Sheet: Sheet1
	TABLE S1
					Wild-type					Knockout				ANOVA: Significant Effects
					2-month-old		9-month-old	15-month-old		2-month-old	9-month-old	15-month-old		Age	Genotype	A-by-G	F-statistic
	Epiphysis (trabecular only)
			TV (mm3)		0.70 ± 0.15		0.52 ± 0.10	0.54 ± 0.39		0.60 ± 0.21	0.70 ± 0.16	0.87 ± 0.11			*	*		4.32	3.62
			BV (mm3)		0.40 ± 0.07		0.27 ± 0.06	0.18 ± 0.08		0.15 ± 0.02	0.16 ± 0.03	0.15 ± 0.03		**	**	**	14.4	70	15.9
			BV/TV		0.55 ± 0.07		0.51 ± 0.08	0.38 ± 0.14		0.27 ± 0.11	0.24 ± 0.09	0.18 ± 0.05		**	**		8.35	83.9
			Bone Density (mg HA/cm3)		995 ± 41		1187 ± 26	1154 ± 57		1094 ± 42	1142 ± 27	1137 ± 32		**		*	58.8		20.2
			ConnDens (1/mm3)		424 ± 51		403 ± 60	471 ± 69		411 ± 134	322 ± 107	211 ± 83		*	**	**	3.27	22.58	9.01
			SMI		-0.01 ± 0.31		0.44 ± 0.42	1.25 ± 0.64		1.75 ± 0.45	1.86 ± 0.52	2.30 ± 0.43		**	**		14.9	104
			Tb.N (1/mm)		10.7 ± 0.5		9.3 ± 1.6	8.7 ± 3.4		7.6 ± 1.4	7.5 ± 2.5	5.8 ± 0.6		*	**		3.2	20.5
			Tb.Th (mm)		0.065 ± 0.006		0.069 ± 0.005	0.056 ± 0.010		0.047 ± 0.004	0.050 ± 0.009	0.047 ± 0.007		**	**		4.97	53
			Tb.Sp (mm)		0.091 ± 0.008		0.114 ± 0.011	0.142 ± 0.041		0.150 ± 0.027	0.157 ± 0.033	0.189 ± 0.019		**	**		11	41.2
	Epiphysis (trabecular + cortical)
			TV (mm3)		1.22 ± 0.18		1.30 ± 0.13	1.63 ± 0.69		1.14 ± 0.33	1.27 ± 0.19	1.55 ± 0.17		**			5.78
			BV (mm3)		0.80 ± 0.14		1.00 ± 0.11	1.17 ± 0.35		0.62 ± 0.15	0.67 ± 0.04	0.76 ± 0.08		**	**		8	32.1
			BV/TV		0.66 ± 0.09		0.76 ± 0.05	0.75 ± 0.09		0.56 ± 0.07	0.54 ± 0.07	0.49 ± 0.04			**	*		89.8	5.39
			Bone Density (mg HA/cm3)		996 ± 46		1203 ± 38	1192 ± 43		1052 ± 38	1102 ± 21	1090 ± 13		**	**	**	77.3	27.8	31.5
			Length (μm)		438 ± 26		481 ± 25	518 ± 116		464 ± 72	466 ± 74	541 ± 63		**			5.16
	Epiphysis (subchondral only)
			Length (μm)		98 ± 33		168 ± 25	198 ± 49		131 ± 34	117 ± 44	135 ± 45		**	*	**	7.51	5.99	7.52
	Metaphysis (trabecular + cortical)
			BV (mm3)		0.35 ± 0.19		0.97 ± 0.20	0.98 ± 0.19		0.72 ± 0.27	0.66 ± 0.26	0.67 ± 0.14		**		**	9.97		14.1
			Bone Density (mg HA/cm3)		888 ± 29		1190 ± 41	1176 ± 33		1042 ± 81	1111 ± 18	1135 ± 19		**		**	106		35.3
			Mineral content (μg HA)		0.31 ± 0.18		1.15 ± 0.22	1.15 ± 0.23		0.76 ± 0.31	0.73 ± 0.28	0.76 ± 0.15		**		**	16.8		17.9
